# Supplementary material for: A trinuclear nickel(ii) Schiff base complex with phenoxido- and acetato-bridges: combined experimental and theoretical magneto-structural correlation
Source: Royal Society of Chemistry journal article supplement (doi:10.1039/d0dt03969a), 2021-01-01
Supplement: d0dt03969a1.pdf [file d0dt03969a1.pdf]

## Supporting Information

### A Trinuclear Nickel(II) Schiff Base Complex with Phenoxido- and Acetato-Bridges: Combined Experimental and Theoretical Magneto-structural Correlation

Santarupa Thakurta,<sup>1\*</sup> Monami Maiti,<sup>2</sup> Ray J. Butcher,<sup>3</sup> Carlos J. Gómez-García,<sup>4</sup> and Arshak A. Tsaturyan<sup>5,6</sup>

<sup>1</sup> Department of Chemistry, Prabhu Jagatbandhu College, Howrah 711302, West Bengal, India

<sup>2</sup> Department of Chemistry, Narasinha Dutt College, Howrah 711101, West Bengal, India

<sup>3</sup> Department of Chemistry, Howard University, 2400 Sixth Street NW, Washington, DC 20059, USA

<sup>4</sup> Department of Inorganic Chemistry, Institute of Molecular Science (ICMol), C/Catedrático José Beltrán, 2, 46980 Paterna, Spain

<sup>5</sup> Institute of Physical and Organic Chemistry, Southern Federal University, Stachki Av. 194/2, 344090 Rostov-on-Don, Russian Federation

<sup>6</sup> Department of Chemistry, University of Turin, Via Pietro Giuria 7, 10125, Torino, Italy

**Table S1.** Hydrogen bond in complex **1** (distances in Å and angles in degrees).

| D-H...A                    | D-H     | H...A   | D...A      | <(D-H-A) |
|----------------------------|---------|---------|------------|----------|
| O1M-H1M...O1A <sup>#</sup> | 0.76(2) | 2.01(2) | 2.7575(17) | 173(2)   |

Symmetry transformations used to generate equivalent atoms:

$$\# = -x + 1, y, -z + \frac{1}{2}$$

**Table S2.** Selected optimized structural parameters of complex **1** in HS and BS spin states, obtained with various DFT functionals.

| Functional            | Spin state       | Ni1-O1     | Ni1-O1A    | Ni1-O2     | Ni2-O1/<br>Ni3-O1 | Ni2-O2A/<br>Ni3-O2A | Ni2-O1M/<br>Ni3-O1M | Ni2-N/<br>Ni3-N | Ni2-N1/<br>Ni3-N1 | Ni2-N2/<br>Ni3-N2 | Ni3-O1-Ni<br>1 | Ni2-O1-Ni<br>1 |
|-----------------------|------------------|------------|------------|------------|-------------------|---------------------|---------------------|-----------------|-------------------|-------------------|----------------|----------------|
| B3LYP                 | HS<br><i>aaa</i> | 2.06       | 2.03       | 2.13       | 2.08              | 2.08                | 2.18                | 2.01            | 2.02              | 2.12              | 116.81         | 116.81         |
|                       | BS<br><i>aaβ</i> | 2.06       | 2.03       | 2.13       | 2.08              | 2.08                | 2.18                | 2.01            | 2.02              | 2.12              | 116.81         | 116.96         |
|                       | BS<br><i>αβa</i> | 2.06       | 2.03       | 2.12       | 2.08              | 2.08                | 2.18                | 2.01            | 2.02              | 2.12              | 116.96         | 116.97         |
| B3LYP*                | HS<br><i>aaa</i> | 2.07       | 2.05       | 2.14       | 2.10              | 2.11                | 2.20                | 2.01            | 2.04              | 2.13              | 118.68         | 118.50         |
|                       | BS<br><i>aaβ</i> | 2.07       | 2.05       | 2.14       | 2.10              | 2.11                | 2.20                | 2.01            | 2.04              | 2.13              | 118.48         | 118.90         |
|                       | BS<br><i>αβa</i> | 2.07       | 2.05       | 2.14       | 2.10              | 2.11                | 2.20                | 2.01            | 2.04              | 2.13              | 118.85         | 118.78         |
| TPSSh                 | HS<br><i>aaa</i> | 2.04       | 2.01       | 2.10       | 2.06              | 2.07                | 2.15                | 1.98            | 2.01              | 2.09              | 119.03         | 118.92         |
|                       | BS<br><i>aaβ</i> | 2.04       | 2.01       | 2.10       | 2.06              | 2.07                | 2.15                | 1.98            | 2.01              | 2.09              | 118.64         | 118.98         |
|                       | BS<br><i>αβa</i> | 2.04       | 2.01       | 2.10       | 2.06              | 2.07                | 2.15                | 1.98            | 2.01              | 2.09              | 119.03         | 119.15         |
| Experimental data XRD |                  | 2.0134(11) | 2.0212(11) | 2.1166(11) | 2.0472(11)        | 2.0465(12)          | 2.1874(12)          | 2.0236(16)      | 2.0195(15)        | 2.0666(15)        | 117.87(5)      | 117.87(5)      |

**Table S3.** Total energies ( $E$ , a.u.), relative energies ( $\Delta E$ , kcal mol<sup>-1</sup>) and expectation values of the spin-squared ( $\langle S^2 \rangle$ ) operator for the high-spin and broken symmetry (BS) states of the complex **1** calculated by the DFT method with different functionals.

| Functional | Spin state                  | $S$ | $E$ , a.u.   | $\Delta E$ , kcal/mol | $\langle S^2 \rangle$ |
|------------|-----------------------------|-----|--------------|-----------------------|-----------------------|
| B3LYP      | HS ( $\alpha\alpha\alpha$ ) | 3/2 | -7799.001444 | 0.049                 | 12.011                |
|            | BS ( $\alpha\alpha\beta$ )  | 1/2 | -7799.001483 | 0.024                 | 4.008                 |
|            | BS ( $\alpha\beta\alpha$ )  | 1/2 | -7799.001522 | 0                     | 4.006                 |
| B3LYP*     | HS ( $\alpha\alpha\alpha$ ) | 3/2 | -7771.134572 | 0.196                 | 12.011                |
|            | BS ( $\alpha\alpha\beta$ )  | 1/2 | -7771.13473  | 0.097                 | 4.006                 |
|            | BS ( $\alpha\beta\alpha$ )  | 1/2 | -7771.134885 | 0                     | 4.001                 |
| TPSSh      | HS ( $\alpha\alpha\alpha$ ) | 3/2 | -7799.013977 | 0.206                 | 12.011                |
|            | BS ( $\alpha\alpha\beta$ )  | 1/2 | -7799.01414  | 0.104                 | 4.006                 |
|            | BS ( $\alpha\beta\alpha$ )  | 1/2 | -7799.014306 | 0                     | 4.001                 |

**Table S4.** Mulliken spin populations ( $\rho$ ) and total charges ( $q$ ) on atoms of the exchange fragment (B3LYP/6-311G(d,p)) in high (HS) and low spin states (BS).

| Atom | HS           | BS ( $\alpha\beta\alpha$ ) | BS ( $\alpha\alpha\beta$ ) |
|------|--------------|----------------------------|----------------------------|
|      | $\rho/q$     | $\rho/q$                   | $\rho/q$                   |
| Ni1  | 1.766/1.454  | -1.763/1.453               | 1.765/1.454                |
| Ni2  | 1.739/1.469  | 1.738/1.468                | -1.738/1.468               |
| Ni3  | 1.739/1.469  | 1.738/1.468                | 1.739/1.469                |
| O27  | 0.071/-0.788 | -0.003/-0.788              | 0.071/-0.788               |
| O4   | 0.071/-0.786 | -0.003/-0.788              | 0.003/-0.788               |
| N34  | 0.065/-0.545 | 0.065/-0.545               | 0.065/-0.545               |
| N10  | 0.065/-0.545 | 0.065/-0.545               | -0.065/-0.545              |

## X-ray powder analysis

The X-ray powder diffractogram was collected for a polycrystalline sample of compound **1** using a 0.5 mm glass capillary that was mounted and aligned on an Empyrean PAN analytical powder diffractometer, using CuK $\alpha$  ( $\lambda = 1.54177 \text{ \AA}$ ). A total of 3 scans were collected at room temperature in the  $2\theta$  range 5-40 $^\circ$ .

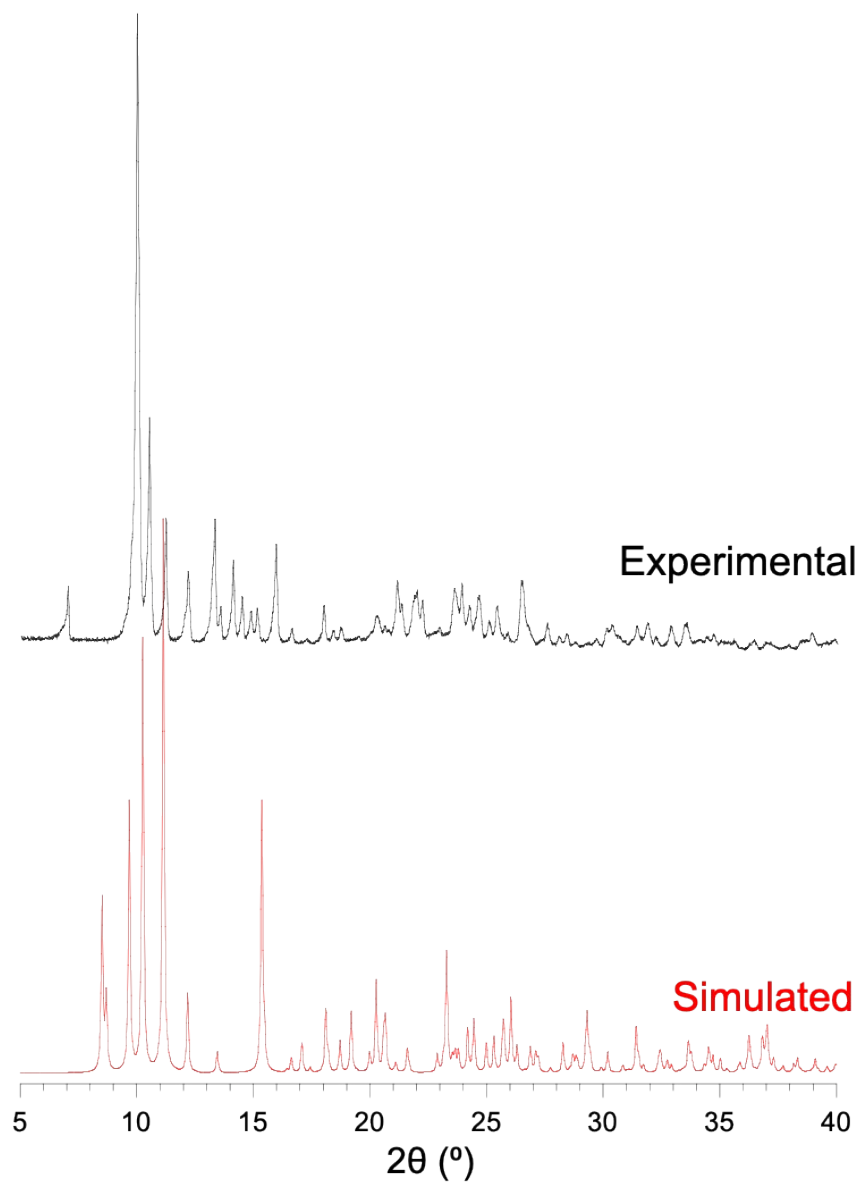

**Figure S1.** X-ray powder diffractogram for complex **1** and the simulated one from the cif file.

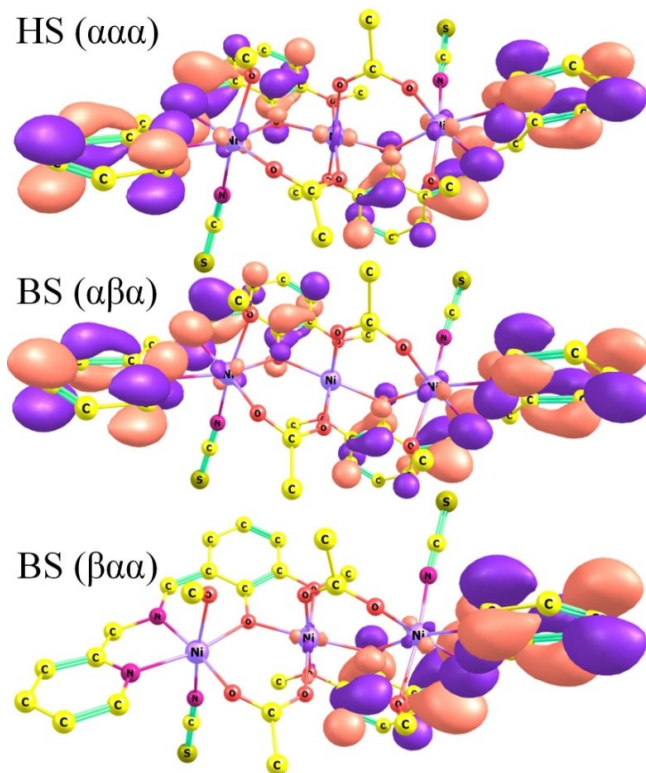

**Fig. S2.** Shape of the localized magnetically active SOMOs of the complex **1** (hydrogen atoms are removed for clarity, contour value is  $0.03 \text{ e} \cdot \text{\AA}^{-3}$ ) that are occupied by three “parallel”  $\alpha$ -spins for the HS state and “opposite”  $\alpha/\beta$ -spins for the BS state.
